# Supplementary material for: Efficient adsorption of 1,4-naphthoquinone on covalent organic frameworks
Source: Royal Society of Chemistry journal article supplement (doi:10.1039/d5en01025j), 2026-01-01
Supplement: d5en01025j1.pdf [file d5en01025j1.pdf]

# Efficient adsorption of 1, 4-naphthoquinone on covalent organic frameworks

*Yiting Wang<sup>a</sup>, Jing Pan<sup>\*, b</sup>, and Fan Xia<sup>\*, b</sup>*

a. School of Chemistry and Materials Science, South-Central Minzu University,  
Wuhan 430074, China.

b. State Key Laboratory of Geomicrobiology and Environmental Changes, Faculty  
of Materials Science and Chemistry, China University of Geosciences, Wuhan 430074,  
China.

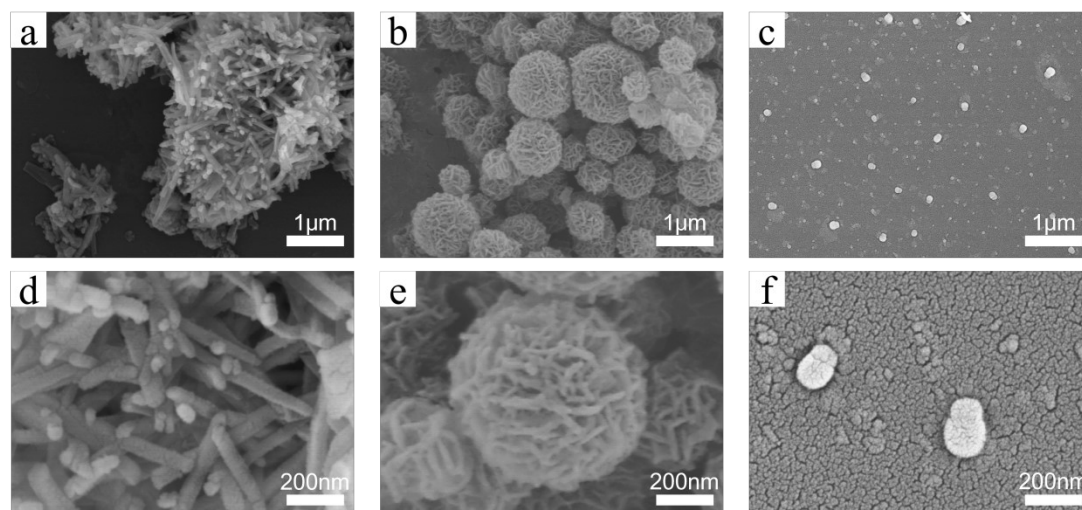

Figure S1. (a, d) FESEM images of COF<sub>TF</sub>-DBD; (b, e) FESEM images of COF<sub>TFP</sub>-DBD;  
(c, f) FESEM images of COF<sub>TMTF</sub>-DBD.

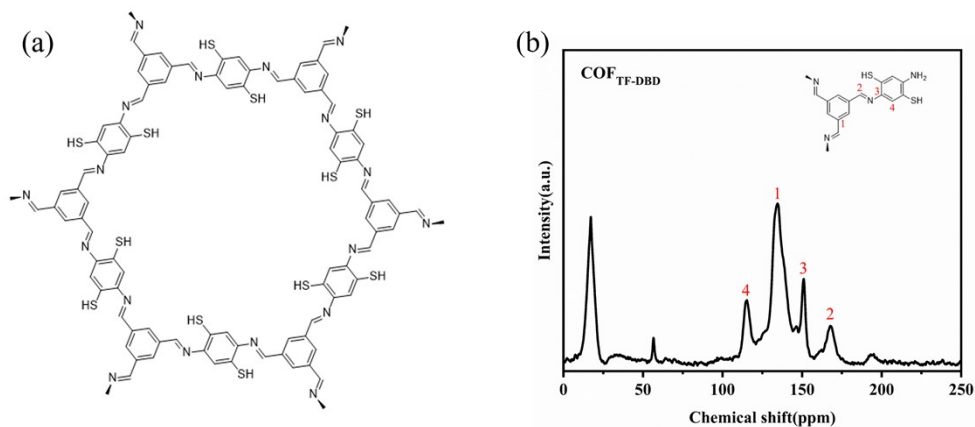

Figure S2. (a) Solid-state NMR spectrum and (b) Structural diagram of COF<sub>TF-DBD</sub>.

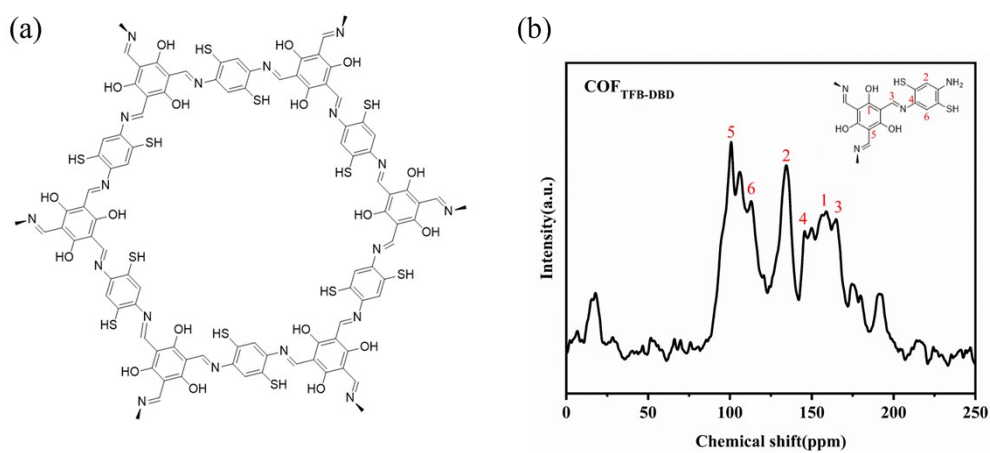

Figure S3. (a) Solid-state NMR spectrum and (b) Structural diagram of COF<sub>TFB-DBD</sub>.

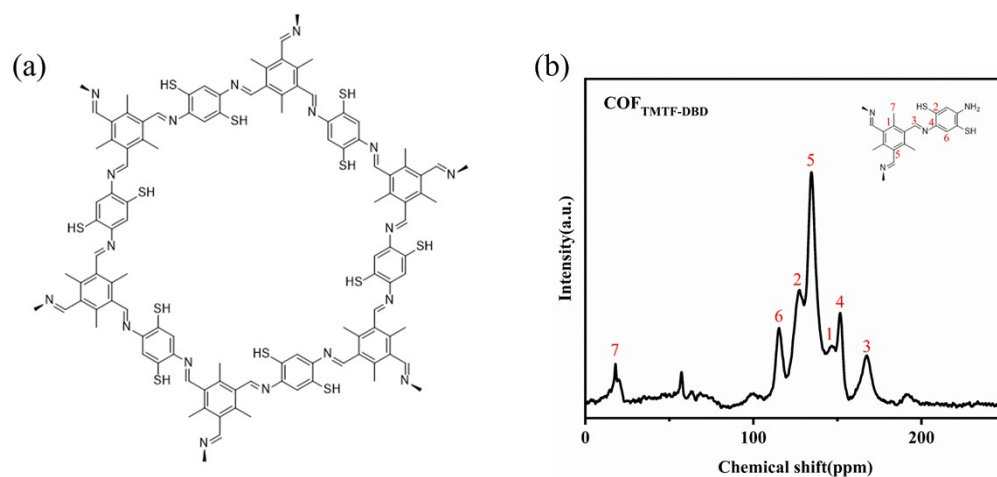

Figure S4. (a) Solid-state NMR spectrum and (b) Structural diagram of COF<sub>TMTF-DBD</sub>.

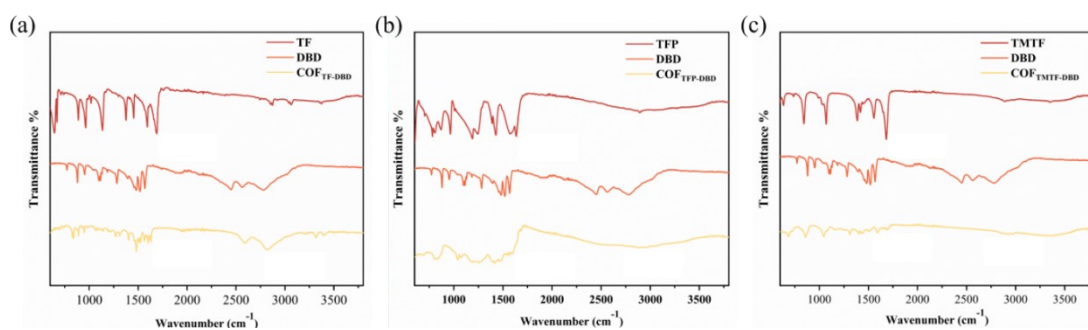

Figure S5. FTIR spectrum of COF<sub>TF-DBD</sub>; (b) FTIR spectrum of COF<sub>TFP-DBD</sub>; (c) FTIR spectrum of COF<sub>TMTF-DBD</sub>.

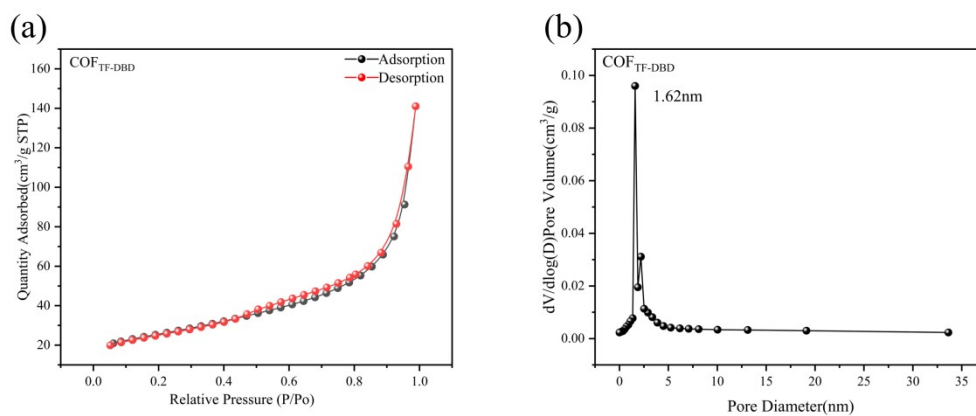

Figure S6. Adsorption-desorption isotherm and (b) Particle size distribution of COF<sub>TF</sub>-DBD.

DBD-

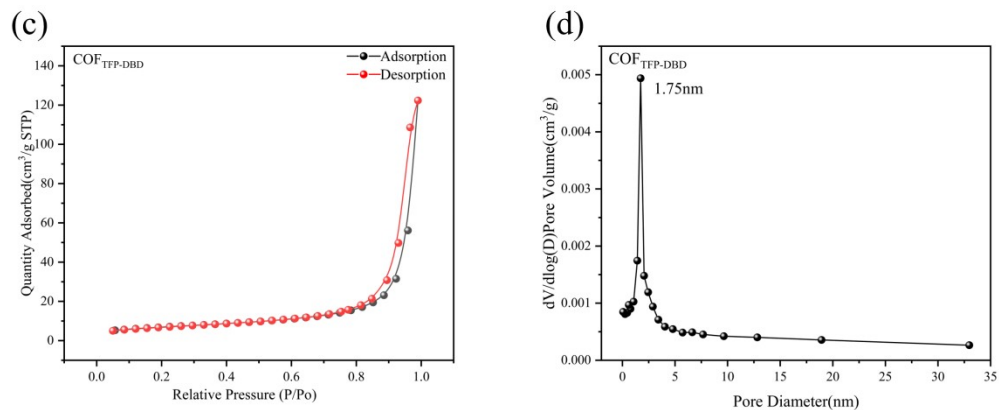

Figure S7. Adsorption-desorption isotherm and (b) Particle size distribution of COF<sub>TF</sub>-DBD.

DBD.

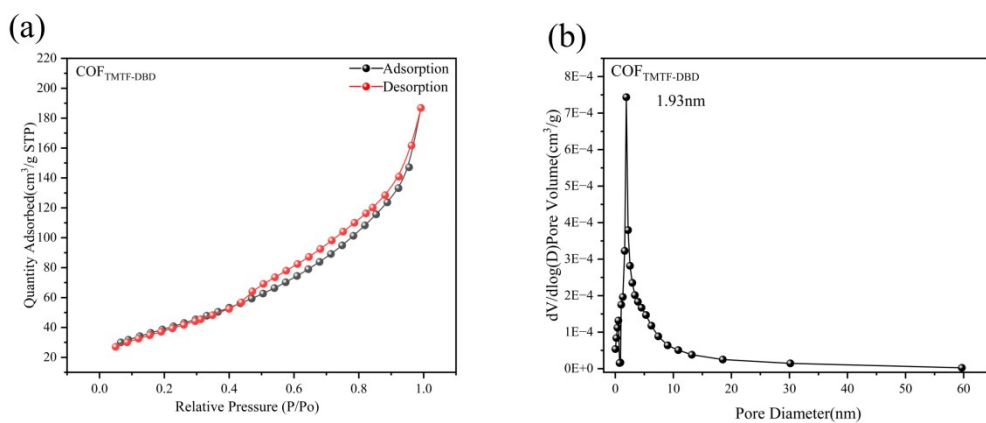

Figure S8. Adsorption-desorption isotherm and (b) Particle size distribution of COF<sub>TMTF</sub>-DBD.
